# Supplementary material for: Evolution of Glaucoma-Related Mortality among Older Adults in the United States: Insights from CDC WONDER (2000–2023)
Source: Research Square preprint supplement (doi:10.21203/rs.3.rs-7850550/v1), 2025-11-12
Supplement: Supplementary file 1 [file f07c8a22ec0aba65ca4fccf0.docx]

**Supplementary Materials**

**Supplemental Table 1:** Specified ICD-10 Codes

| **Glaucoma-Related Deaths** |
| --- |
| Glaucoma (H40) |
| **Leading Underlying Causes of Glaucoma-Related Deaths** |
| Heart Disease (I00-I09, I11, I13, I20-I51) |
| Malignant neoplasms (C00-C97) |
| Cerebrovascular diseases (I60-I69) |
| Alzheimer's disease (G30) |
| Influenza and pneumonia (J09-J18) |
| Diabetes mellitus (E10-E14) |
| Sepsis (A40-A41) |
| Chronic lower respiratory diseases (J40-J47) |
| Nephritis/nephrotic syndrome/nephrosis (N00-N07, N17-N19, N25-N27) |
| Unintentional injuries (V01-X59, Y85-Y86) |
| Parkinson's disease (G20-G21) |
| COVID-19 (U07.1) |
| Pneumonitis due to solids and liquids (J69) |
| Chronic liver disease and cirrhosis (K70, K73-K74) |
| Essential hypertension and hypertensive renal disease (I10, I12, I15) |
| In situ/benign/uncertain or unknown behavior neoplasms (D00-D48) |
| Nutritional deficiencies (E40-E64) |
| Anemias (D50-D64) |

**ICD-10:** International Statistical Classification of Disease and Related Health Problems, 10th Revision

**Supplemental Table 2:** Glaucoma-related deaths and percent of total deaths among Adults Aged ≥ 65 Years Stratified by Overall, Sex, Race, Age Group, Place of Death, Urbanization, and Census Region in the United States from 2000 to 2023.

| **Variables** | **Deaths** | **% of Total Deaths** |
| --- | --- | --- |
| **Overall** | 21,805 | 100 % |
| **Sex** | | |
| **Women** | 13,738 | 63 % |
| **Men** | 8,067 | 37 % |
| **Race** | | |
| **NH Black/African American** | 3,182 | 14.59 % |
| **NH White** | 16,945 | 77.71 % |
| **Hispanic/Latino** | 1,105 | 5.07 % |
| **Age Group** | | |
| **Adults Aged 65-74 years** | 1,913 | 8.77 % |
| **Adults Aged 75-84 years** | 5,503 | 25.24 % |
| **Adults Aged ≥ 85 years** | 14,389 | 65.99 % |
| **Place of Death** | | |
| **Medical Facilities** | 4,828 | 22.14% |
| **Decedent's Home** | 4,865 | 22.31% |
| **Hospices** | 699 | 3.21% |
| **Nursing home/long term care** | 10,216 | 46.85% |
| **Other/Unknown** | 1,197 | 5.49% |
| **Urbanization (2000 - 2020)** | | |
| **Metropolitan Areas** | 14,698 | 67.41% |
| **Non-metropolitan Areas** | 3,774 | 17.31 % |
| **Census Region** | | |
| **Northeast** | 4,864 | 22.31 % |
| **Midwest** | 5,562 | 25.51 % |
| **South** | 6,718 | 30.81 % |
| **West** | 4,661 | 21.38 % |

NH = non-Hispanic

**Supplemental Table 3**: Overall and Sex-Stratified Glaucoma-Related Age-Adjusted Mortality Rates among Adults Aged ≥ 65 years in the United States, 2000 to 2023.

| **Age-Adjusted Mortality Rate /100,000 (95% CI)** | | | |
| --- | --- | --- | --- |
| **Year** | **Overall** | **Men** | **Women** |
| **2000** | 2.98 (2.80 - 3.16) | 2.97 (2.66 - 3.29) | 3.00 (2.78 - 3.23) |
| **2001** | 3.00 (2.82 - 3.18) | 2.90 (2.59 - 3.21) | 2.98 (2.76 - 3.20) |
| **2002** | 2.94 (2.76 - 3.12) | 2.82 (2.52 - 3.12) | 2.97 (2.75 - 3.19) |
| **2003** | 2.78 (2.61 - 2.95) | 2.70 (2.41 - 2.99) | 2.84 (2.63 - 3.06) |
| **2004** | 2.48 (2.32 - 2.64) | 2.38 (2.11 - 2.65) | 2.53 (2.32 - 2.73) |
| **2005** | 2.33 (2.18 - 2.48) | 2.22 (1.96 - 2.48) | 2.34 (2.15 - 2.53) |
| **2006** | 2.28 (2.13 - 2.43) | 2.16 (1.91 - 2.41) | 2.37 (2.18 - 2.56) |
| **2007** | 1.95 (1.82 - 2.09) | 1.90 (1.67 - 2.13) | 1.94 (1.77 - 2.11) |
| **2008** | 1.97 (1.84 - 2.11) | 1.99 (1.76 - 2.22) | 1.94 (1.77 - 2.11) |
| **2009** | 1.80 (1.67 - 1.93) | 1.79 (1.58 - 2.01) | 1.83 (1.66 - 1.99) |
| **2010** | 1.81 (1.68 - 1.94) | 1.85 (1.63 - 2.06) | 1.71 (1.55 - 1.86) |
| **2011** | 1.63 (1.51 - 1.75) | 1.68 (1.48 - 1.88) | 1.68 (1.53 - 1.84) |
| **2012** | 1.73 (1.61 - 1.86) | 1.65 (1.45 - 1.84) | 1.79 (1.63 - 1.94) |
| **2013** | 1.81 (1.68 - 1.93) | 1.80 (1.59 - 2.00) | 1.78 (1.62 - 1.94) |
| **2014** | 1.61 (1.50 - 1.72) | 1.65 (1.46 - 1.84) | 1.60 (1.45 - 1.74) |
| **2015** | 1.62 (1.51 - 1.74) | 1.61 (1.42 - 1.79) | 1.63 (1.49 - 1.78) |
| **2016** | 1.55 (1.44 - 1.66) | 1.66 (1.47 - 1.84) | 1.44 (1.30 - 1.57) |
| **2017** | 1.70 (1.58 - 1.81) | 1.76 (1.57 - 1.95) | 1.65 (1.51 - 1.79) |
| **2018** | 1.83 (1.72 - 1.95) | 1.92 (1.72 - 2.11) | 1.81 (1.66 - 1.96) |
| **2019** | 1.71 (1.59 - 1.82) | 1.70 (1.51 - 1.88) | 1.77 (1.62 - 1.92) |
| **2020** | 2.21 (2.09 - 2.34) | 2.32 (2.11 - 2.53) | 2.16 (1.99 - 2.32) |
| **2021** | 2.15 (2.02 - 2.28) | 2.20 (1.99 - 2.41) | 2.09 (1.93 - 2.26) |
| **2022** | 2.05 (1.93 - 2.18) | 2.19 (1.99 - 2.39) | 1.93 (1.78 - 2.08) |
| **2023** | 2.29 (2.16 - 2.42) | 2.37 (2.16 - 2.58) | 2.21 (2.05 - 2.38) |
| **Average** | **2.09 (1.96 - 2.23)** | **2.09 (1.86 - 2.32)** | **2.08 (1.91 - 2.25)** |

**Supplemental Table 4**: Summary of Changes in Glaucoma-Related Age-adjusted Mortality Rates by APC and AAPC among Adults Aged ≥ 65 years in the United States, 2000 to 2023.

| **Year Interval** | **APC (95% CI, p-value)** | | **AAPC (95% CI, p-value)** |
| --- | --- | --- | --- |
| **Overall** | | | |
| **2000–2009** | -6.01*(-10.46 to -4.53, p = 0.014) | | -1.39*(-1.88 to -0.92, p < 0.001 |
| **2009–2016** | -1.83 (-4.80 to 4.32, p = 0.365) | |
| **2016-2023** | 5.36*(2.86 to 10.91, p = 0.021) | |
| **Sex** | | | |
| **Men** | | | |
| **2000–2009** | -5.71*(-11.25 to -2.68, p = 0.034) | | -1.09*(-1.59 to -0.53, p < 0.001) |
| **2009–2015** | -1.86 (-6.05 to 8.89, p = 0.537) | |
| **2015-2023** | 5.01*(0.41 to 10.53, p = 0.048) | |
| **Women** | | | |
| **2000–2010** | -5.84*(-10.80 to -0.23, p = 0.048) | | -1.57*(-2.17 to -1.01, p < 0.001) |
| **2010–2016** | -1.62 (-8.15 to 8.14, p = 0.489) | |
| **2016-2023** | 4.92 (-0.19 to 11.87, p = 0.052) | |
| **Race** | | | |
| **NH White** | | | |
| **2000-2010** | | -5.89*(-8.03 to -5.07, p = 0.004) | -1.39*(-1.74 to -1.05, p < 0.001) |
| **2010-2016** | | -1.12 (-4.46 to 2.51, p = 0.394) |
| **2016-2023** | | 5.15*(3.63 to 9.02, p = 0.004) |
| **NH Black/African American** | | | |
| **2000 - 2014** | -5.55*(-8.87 to -3.69, p < 0.001) | | -1.17*(-2.17 to -0.12, p = 0.031) |
| **2014 - 2023** | 6.05*(2.56 to 14.61, p = 0.003) | |
| **Hispanic/Latino** | | | |
| **2000–2023** | 0.56 (-0.77 to 2.40, p = 0.298) | | 0.56 (-0.77 to 2.40, p = 0.298) |
| **Age Group**** | | | |
| **Adults Aged 65-74 Years** | | | |
| **2000–2015** | -5.19*(-7.33 to -3.67, p < 0.001) | | -0.75 (-1.62 to 0.19, p = 0.121) |
| **2015–2023** | 8.16* (4.62 to 14.45, p < 0.001) | |
| **Adults Aged 75-84 Years** | | | |
| **2000–2014** | -5.1*(-6.09 to -4.31, p < 0.001) | | -1.83*(-2.26 to -1.37, p < 0.001) |
| **2014–2023** | 3.50*(1.90 to 5.84, p < 0.001) | |
| **Adults Aged ≥ 85 Years** | | | |
| **2000–2010** | -5.78*(-10.09 to -1.95, p = 0.036) | | -1.30*(-1.82 to -0.79, p < 0.001) |
| **2010–2016** | -0.54 (-7.07 to 4.12, p = 0.706) | |
| **2016-2023** | 4.80* (1.85 to 11.07, p = 0.033) | |
| **Urbanization (2000-2020)** | | | |
| **Metropolitan** | | | |
| **2000–2009** | -6.35*(-10.16 to -4.81, p = 0.012) | | -2.09*(-2.69 to -1.59, p < 0.001) |
| **2009–2016** | -1.09 (-5.95 to 1.70, p = 0.341) | |
| **2016-2020** | 6.34*(2.15 to 14.07, p = 0.003) | |
| **Non-metropolitan** | | | |
| **2000–2015** | -5.27*(-7.53 to -4.32, p = 0.002) | | -2.74*(-3.84 to -1.96, p < 0.001) |
| **2015-2020** | 5.28 (-0.93 to 21.91, p = 0.090) | |
| **Census Region** | | | |
| **Northeast** | | | |
| **2000–2008** | -7.19*(-10.44 to -4.91, p = 0.014) | | 0.13 (-0.55 to 0.71, p = 0.679) |
| **2008–2013** | 6.41*(0.87 to 15.96, p = 0.048) | |
| **2013–2016** | -10.11*(-15.35 to -1.17, p = 0.044) | |
| **2016-2020** | 16.03*(10.96 to 25.42, p = 0.036) | |
| **2020-2023** | 1.39 (-7.34 to 6.55, p = 0.657) | |
| **Midwest** | | | |
| **2000–2014** | -6.32*(-8.99 to -5.30, p = 0.003) | | -4.33*(-5.15 to -3.61, p < 0.001) |
| **2014–2023** | -1.16 (-3.76 to 7.42, p = 0.580) | |
| **South** | | | |
| **2000–2010** | -6.69*(-13.48 to -3.78, p = 0.042) | | -1.33*(-2.08 to -0.62, p = 0.003) |
| **2010–2018** | -0.42 (-7.82 - 4.60, p = 0.667) | |
| **2018–2023** | 8.75*(3.44 to 19.97, p = 0.022) | |
| **West** | | | |
| **2000–2004** | -0.07 (-4.76 to 9.21, p = 0.996) | | 0.02 (-0.52 to 0.64, p = 0.889) |
| **2004–2010** | -7.63 (-13.57 to 4.42, p = 0.091) | |
| **2010–2023** | 3.79* (2.69 to 5.01, p = 0.020) | |

APC = Annual percent change, AAPC = Average annual percent change, CI = Confidence Interval

*Indicates APC/AAPC is significantly different from 0

**Indicates change in crude mortality rate (CMR)

**Supplemental Table 5:** Glaucoma-Related Age-Adjusted Mortality Rates, Stratified by Race among Adults Aged ≥ 65 years in the United States, 2000 to 2023.

| **Age-Adjusted Mortality Rate /100,000 (95% CI)** | | | |
| --- | --- | --- | --- |
| **Year** | **NH Black/African American** | **NH White** | **Hispanic/Latino** |
| **2000** | 5.83 (4.90 - 6.75) | 2.87 (2.68 - 3.06) | 1.73 (1.10 - 2.59) |
| **2001** | 5.65 (4.74 - 6.56) | 2.89 (2.70 - 3.08) | 1.42 (0.87 - 2.20) |
| **2002** | 5.55 (4.65 - 6.45) | 2.78 (2.59 - 2.96) | 1.58 (1.00 - 2.38) |
| **2003** | 5.16 (4.30 - 6.03) | 2.64 (2.46 - 2.82) | 2.22 (1.54 - 3.11) |
| **2004** | 4.72 (3.89 - 5.54) | 2.32 (2.15 - 2.48) | 1.66 (1.09 - 2.41) |
| **2005** | 4.51 (3.72 - 5.31) | 2.16 (2.00 - 2.32) | 1.85 (1.26 - 2.61) |
| **2006** | 3.84 (3.12 - 4.56) | 2.22 (2.06 - 2.38) | 1.99 (1.41 - 2.73) |
| **2007** | 3.38 (2.74 - 4.12) | 1.87 (1.72 - 2.02) | 1.13 (0.72 - 1.70) |
| **2008** | 4.30 (3.55 - 5.04) | 1.84 (1.70 - 1.99) | 1.05 (0.65 - 1.60) |
| **2009** | 3.30 (2.66 - 3.95) | 1.75 (1.62 - 1.89) | 1.05 (0.67 - 1.56) |
| **2010** | 3.77 (3.09 - 4.45) | 1.64 (1.51 - 1.78) | 1.42 (0.98 – 2.00) |
| **2011** | 2.87 (2.32 - 3.51) | 1.60 (1.47 - 1.73) | 1.22 (0.83 - 1.73) |
| **2012** | 3.07 (2.48 - 3.66) | 1.62 (1.49 - 1.75) | 1.62 (1.18 - 2.18) |
| **2013** | 3.27 (2.67 - 3.87) | 1.67 (1.54 - 1.80) | 1.90 (1.43 - 2.47) |
| **2014** | 2.38 (1.91 - 2.94) | 1.57 (1.45 - 1.70) | 1.60 (1.19 - 2.10) |
| **2015** | 2.5 (2.02 - 3.06) | 1.57 (1.45 - 1.70) | 1.84 (1.41 - 2.36) |
| **2016** | 2.89 (2.36 - 3.43) | 1.48 (1.36 - 1.60) | 1.63 (1.24 - 2.12) |
| **2017** | 3.46 (2.88 - 4.03) | 1.59 (1.46 - 1.71) | 1.53 (1.16 - 1.97) |
| **2018** | 3.42 (2.86 - 3.99) | 1.71 (1.58 - 1.84) | 1.46 (1.11 - 1.88) |
| **2019** | 3.04 (2.51 - 3.56) | 1.73 (1.60 - 1.86) | 1.29 (0.96 - 1.69) |
| **2020** | 4.29 (3.69 - 4.90) | 2.05 (1.91 - 2.19) | 1.94 (1.55 - 2.40) |
| **2021** | 4.64 (3.99 - 5.30) | 2.01 (1.86 - 2.15) | 1.57 (1.21 – 2.00) |
| **2022** | 4.01 (3.42 - 4.60) | 1.99 (1.85 - 2.13) | 1.59 (1.24 – 2.00) |
| **2023** | 4.15 (3.54 - 4.75) | 2.17 (2.03 - 2.32) | 2.27 (1.83 - 2.71) |
| **Average** | **3.92 (3.25 - 4.60)** | **1.99 (1.84 - 2.14)** | **1.61 (1.15 - 2.19)** |

**Supplemental Table 6:** Glaucoma-Related Crude Mortality Rates, Stratified by Age Group among Adults Aged ≥ 65 years in the United States, 2000 to 2023.

| **Crude Mortality Rate /100,000 (95% CI)** | | | |
| --- | --- | --- | --- |
| **Year** | **Adults Aged 65-74 Years** | **Adults Aged 75-84 Years** | **Adults Aged ≥ 85 Years** |
| **2000** | 0.53 (0.43 - 0.65) | 2.54 (2.26 - 2.82) | 14.91 (13.74 - 16.07) |
| **2001** | 0.43 (0.34 - 0.54) | 2.29 (2.03 - 2.56) | 16.07 (14.87 - 17.27) |
| **2002** | 0.42 (0.34 - 0.53) | 2.26 (2.00 - 2.53) | 15.56 (14.40 - 16.73) |
| **2003** | 0.50 (0.41 - 0.62) | 2.37 (2.11 - 2.64) | 13.61 (12.53 - 14.70) |
| **2004** | 0.40 (0.32 - 0.50) | 2.02 (1.78 - 2.27) | 12.67 (11.64 - 13.71) |
| **2005** | 0.31 (0.24 - 0.40) | 1.81 (1.57 - 2.04) | 12.55 (11.54 - 13.56) |
| **2006** | 0.34 (0.26 - 0.43) | 1.83 (1.59 - 2.06) | 12.15 (11.17 - 13.12) |
| **2007** | 0.29 (0.22 - 0.38) | 1.49 (1.28 - 1.70) | 10.32 (9.43 - 11.21) |
| **2008** | 0.33 (0.25 - 0.41) | 1.69 (1.47 - 1.91) | 9.85 (9.00 - 10.71) |
| **2009** | 0.24 (0.18 - 0.32) | 1.48 (1.27 - 1.69) | 9.50 (8.68 - 10.33) |
| **2010** | 0.26 (0.20 - 0.34) | 1.50 (1.29 - 1.71) | 9.12 (8.32 - 9.92) |
| **2011** | 0.25 (0.19 - 0.32) | 1.34 (1.15 - 1.54) | 8.68 (7.92 - 9.44) |
| **2012** | 0.30 (0.24 - 0.38) | 1.31 (1.12 - 1.51) | 9.12 (8.35 - 9.89) |
| **2013** | 0.27 (0.21 - 0.34) | 1.48 (1.27 - 1.69) | 9.12 (8.36 - 9.88) |
| **2014** | 0.24 (0.18 - 0.31) | 1.21 (1.03 - 1.40) | 8.83 (8.09 - 9.57) |
| **2015** | 0.23 (0.18 - 0.29) | 1.32 (1.13 - 1.51) | 8.62 (7.90 - 9.35) |
| **2016** | 0.22 (0.17 - 0.28) | 1.24 (1.06 - 1.43) | 8.26 (7.55 - 8.97) |
| **2017** | 0.25 (0.20 - 0.31) | 1.19 (1.01 - 1.37) | 9.49 (8.74 - 10.24) |
| **2018** | 0.29 (0.23 - 0.35) | 1.33 (1.15 - 1.51) | 9.90 (9.14 - 10.66) |
| **2019** | 0.23 (0.18 - 0.29) | 1.35 (1.17 - 1.53) | 9.25 (8.52 - 9.98) |
| **2020** | 0.40 (0.33 - 0.47) | 1.62 (1.42 - 1.81) | 11.68 (10.86 - 12.51) |
| **2021** | 0.37 (0.30 - 0.43) | 1.52 (1.33 - 1.71) | 11.51 (10.65 - 12.37) |
| **2022** | 0.39 (0.32 - 0.45) | 1.58 (1.39 - 1.76) | 10.41 (9.62 - 11.19) |
| **2023** | 0.37 (0.31 - 0.43) | 1.64 (1.45 - 1.82) | 12.33 (11.46 - 13.21) |
| **Average** | **0.33 (0.26 - 0.41)** | **1.64 (1.43 - 1.85)** | **10.98 (10.10 - 11.86)** |

**Supplemental Table 7:** Glaucoma-Related Age-Adjusted Mortality Rates, Stratified by Urbanization among Adults Aged ≥ 65 years in the United States, 2000 to 2020.

| **Age-Adjusted Mortality Rate /100,000 (95% CI)** | | |
| --- | --- | --- |
| **Year** | **Metropolitan** | **Non-metropolitan** |
| **2000** | 2.89 (2.69 - 3.09) | 3.45 (3.01 - 3.89) |
| **2001** | 2.93 (2.73 - 3.13) | 3.31 (2.88 - 3.74) |
| **2002** | 2.87 (2.67 - 3.06) | 3.25 (2.82 - 3.68) |
| **2003** | 2.66 (2.47 - 2.85) | 3.40 (2.96 - 3.83) |
| **2004** | 2.41 (2.24 - 2.59) | 2.94 (2.53 - 3.34) |
| **2005** | 2.21 (2.04 - 2.37) | 2.90 (2.51 - 3.30) |
| **2006** | 2.17 (2.01 - 2.33) | 2.93 (2.53 - 3.33) |
| **2007** | 1.85 (1.71 - 2.00) | 2.43 (2.07 - 2.78) |
| **2008** | 1.82 (1.67 - 1.96) | 2.63 (2.26 – 3.00) |
| **2009** | 1.68 (1.54 - 1.82) | 2.36 (2.01 - 2.71) |
| **2010** | 1.67 (1.53 - 1.80) | 2.19 (1.85 - 2.52) |
| **2011** | 1.58 (1.45 - 1.71) | 2.17 (1.84 - 2.50) |
| **2012** | 1.75 (1.61 - 1.88) | 1.73 (1.44 - 2.02) |
| **2013** | 1.79 (1.66 - 1.93) | 1.70 (1.42 - 1.99) |
| **2014** | 1.66 (1.53 - 1.79) | 1.61 (1.33 - 1.89) |
| **2015** | 1.63 (1.51 - 1.76) | 1.62 (1.34 - 1.90) |
| **2016** | 1.50 (1.38 - 1.62) | 1.90 (1.60 - 2.20) |
| **2017** | 1.70 (1.57 - 1.82) | 1.77 (1.49 - 2.06) |
| **2018** | 1.83 (1.70 - 1.96) | 1.78 (1.50 - 2.06) |
| **2019** | 1.71 (1.58 - 1.83) | 1.81 (1.53 - 2.09) |
| **2020** | 2.16 (2.03 - 2.30) | 2.33 (2.01 - 2.65) |
| **Average** | **2.02 (1.87 - 2.17)** | **2.39 (2.04 - 2.74)** |

**Supplemental Table 8:** Glaucoma-Related Age-Adjusted Mortality Rates, Stratified by Census Region among Adults Aged ≥ 65 years in the United States, 2000 to 2023.

| **Age-Adjusted Mortality Rate /100,000 (95% CI)** | | | | |
| --- | --- | --- | --- | --- |
| **Year** | **Northeast** | **Midwest** | **South** | **West** |
| **2000** | 2.88 (2.50 - 3.26) | 3.79 (3.38 - 4.20) | 2.77 (2.47 - 3.07) | 2.55 (2.17 - 2.93) |
| **2001** | 2.77 (2.40 - 3.14) | 3.99 (3.57 - 4.41) | 2.81 (2.51 - 3.11) | 2.43 (2.06 - 2.80) |
| **2002** | 2.56 (2.20 - 2.91) | 4.00 (3.58 - 4.42) | 2.69 (2.40 - 2.98) | 2.53 (2.16 - 2.91) |
| **2003** | 2.42 (2.08 - 2.77) | 3.67 (3.26 - 4.07) | 2.55 (2.27 - 2.83) | 2.38 (2.03 - 2.74) |
| **2004** | 2.00 (1.69 - 2.31) | 3.34 (2.96 - 3.71) | 2.08 (1.82 - 2.33) | 2.54 (2.17 - 2.90) |
| **2005** | 1.98 (1.67 - 2.29) | 3.11 (2.74 - 3.47) | 2.07 (1.83 - 2.32) | 2.25 (1.92 - 2.59) |
| **2006** | 1.98 (1.68 - 2.28) | 2.94 (2.60 - 3.29) | 2.04 (1.80 - 2.29) | 2.32 (1.98 - 2.66) |
| **2007** | 1.80 (1.51 - 2.09) | 2.44 (2.13 - 2.76) | 1.73 (1.51 - 1.95) | 1.90 (1.60 - 2.20) |
| **2008** | 1.59 (1.32 - 1.85) | 2.78 (2.45 - 3.11) | 1.76 (1.55 - 1.98) | 1.70 (1.42 - 1.97) |
| **2009** | 1.60 (1.33 - 1.86) | 2.57 (2.25 - 2.89) | 1.47 (1.27 - 1.67) | 1.66 (1.39 - 1.93) |
| **2010** | 1.94 (1.65 - 2.23) | 2.24 (1.95 - 2.54) | 1.50 (1.30 - 1.70) | 1.60 (1.33 - 1.87) |
| **2011** | 1.91 (1.62 - 2.19) | 2.02 (1.74 - 2.29) | 1.39 (1.20 - 1.58) | 1.52 (1.27 - 1.77) |
| **2012** | 2.09 (1.79 - 2.38) | 1.70 (1.45 - 1.95) | 1.57 (1.37 - 1.76) | 1.71 (1.45 - 1.97) |
| **2013** | 2.18 (1.87 - 2.48) | 1.94 (1.67 - 2.21) | 1.50 (1.31 - 1.69) | 1.73 (1.47 – 2.00) |
| **2014** | 1.98 (1.69 - 2.27) | 1.44 (1.21 - 1.67) | 1.50 (1.32 - 1.69) | 1.82 (1.55 - 2.08) |
| **2015** | 1.83 (1.56 - 2.10) | 1.74 (1.49 - 1.99) | 1.33 (1.16 - 1.50) | 1.85 (1.59 - 2.12) |
| **2016** | 1.64 (1.38 - 1.90) | 1.67 (1.43 - 1.91) | 1.32 (1.15 - 1.49) | 1.75 (1.50 - 2.01) |
| **2017** | 1.75 (1.49 - 2.01) | 1.55 (1.31 - 1.78) | 1.54 (1.36 - 1.72) | 2.22 (1.94 - 2.51) |
| **2018** | 2.34 (2.04 - 2.64) | 1.79 (1.54 - 2.04) | 1.40 (1.22 - 1.57) | 2.21 (1.93 - 2.49) |
| **2019** | 2.10 (1.82 - 2.38) | 1.57 (1.34 - 1.80) | 1.45 (1.28 - 1.62) | 1.91 (1.66 - 2.17) |
| **2020** | 3.16 (2.81 - 3.50) | 1.83 (1.58 - 2.08) | 1.94 (1.75 - 2.14) | 2.32 (2.04 - 2.60) |
| **2021** | 2.98 (2.64 - 3.33) | 1.65 (1.41 - 1.90) | 1.76 (1.57 - 1.96) | 2.47 (2.17 - 2.77) |
| **2022** | 2.70 (2.38 - 3.02) | 1.47 (1.24 - 1.69) | 1.89 (1.69 - 2.08) | 2.29 (2.02 - 2.57) |
| **2023** | 3.19 (2.84 - 3.54) | 1.37 (1.15 - 1.59) | 2.21 (2.00 - 2.42) | 2.48 (2.19 - 2.76) |
| **Average** | **2.22 (1.92 - 2.53)** | **2.36 (2.06 - 2.66)** | **1.84 (1.63 - 2.06)** | **2.09 (1.79 - 2.39)** |

**Supplemental Table 9:** Top 15-Leading Causes of Glaucoma-Associated Deaths, by Number of Deaths, among Adults Aged ≥ 65 years in the United States, 2000 to 2023.

| **Age-Adjusted Mortality Rate (AAMR) /100,000 (95% CI)** | | | |
| --- | --- | --- | --- |
| **UCD - 15 Leading Causes of Death** | **Deaths (2000-2019)** | **UCD - 15 Leading Causes of Death** | **Deaths (2020-2023)** |
| Heart Disease | 4,000 | Heart Disease | 793 |
| Malignant neoplasms | 2,730 | Malignant neoplasms | 643 |
| Alzheimer’s disease | 1,702 | Alzheimer’s disease | 398 |
| Cerebrovascular diseases | 1,413 | Cerebrovascular diseases | 282 |
| Chronic lower respiratory diseases | 808 | COVID-19 | 276 |
| Diabetes mellitus | 796 | Diabetes mellitus | 199 |
| Essential hypertension and hypertensive renal disease | 687 | Chronic lower respiratory diseases | 172 |
| Unintentional injuries | 348 | Essential hypertension and hypertensive renal disease | 162 |
| Parkinson’s disease | 345 | Unintentional injuries | 115 |
| Influenza and pneumonia | 196 | Parkinson’s disease | 103 |
| Pneumonitis due to solids and liquids | 105 | Nutritional deficiencies | 63 |
| In situ/benign/ uncertain or unknown behavior neoplasms | 103 | Influenza and pneumonia | 36 |
| Sepsis | 85 | Sepsis | 29 |
| Nephritis/nephrotic syndrome/nephrosis | 82 | Chronic liver disease and cirrhosis | 22 |
| Anemias | 61 | In situ/benign/ uncertain or unknown behavior neoplasms | 19 |

**UCD = Underlying cause of death**

**Supplemental Table 10:** Top 15-Leading Causes of Glaucoma-Associated Deaths, by Age-Adjusted Mortality Rates, among Adults Aged ≥ 65 years in the United States, 2000 to 2023.

| **Age-Adjusted Mortality Rate (AAMR) /100,000 (95% CI)** | | | |
| --- | --- | --- | --- |
| **UCD - 15 Leading Causes of Death** | **AAMR (2000-2019)** | **UCD - 15 Leading Causes of Death** | **AAMR (2020-2023)** |
| Heart Disease | 0.44 (0.42 - 0.45) | Heart Disease | 0.34 (0.32 - 0.37) |
| Malignant neoplasms | 0.33 (0.32 - 0.34) | Malignant neoplasms | 0.31 (0.28 - 0.33) |
| Alzheimer’s disease | 0.18 (0.17 - 0.19) | Alzheimer’s disease | 0.18 (0.16 - 0.2) |
| Cerebrovascular diseases | 0.15 (0.14 - 0.15) | Cerebrovascular diseases | 0.13 (0.12 - 0.15) |
| Chronic lower respiratory diseases | 0.08 (0.08 - 0.09) | COVID-19 | 0.12 (0.11 - 0.14) |
| Diabetes mellitus | 0.08 (0.08 - 0.09) | Diabetes mellitus | 0.07 (0.06 - 0.08) |
| Essential hypertension and hypertensive renal disease | 0.06 (0.06 - 0.07) | Chronic lower respiratory diseases | 0.08 (0.07 - 0.10) |
| Unintentional injuries | 0.02 (0.02 - 0.03) | Essential hypertension and hypertensive renal disease | 0.06 (0.05 - 0.07) |
| Parkinson’s disease | 0.06 (0.05 - 0.07) | Unintentional injuries | 0.04 (0.03 - 0.05) |
| Influenza and pneumonia | 0.01 (0.01 - 0.01) | Parkinson’s disease | 0.06 (0.05 - 0.07) |
| Pneumonitis due to solids and liquids | 0.01 (0.01 - 0.01) | Nutritional deficiencies | 0.02 (0.02 - 0.03) |
| In situ/benign/ uncertain or unknown behavior neoplasms | 0.01 (0.01 - 0.02) | Influenza and pneumonia | 0.01 (0.01 - 0.02) |
| Sepsis | 0.01 (0.01 - 0.02) | Sepsis | 0.01 (0.01 - 0.02) |
| Nephritis/nephrotic syndrome/nephrosis | 0.01 (0.01 - 0.02) | Chronic liver disease and cirrhosis | 0.00 (0.00 - 0.00) |
| Anemias | 0.00 (0.00 - 0.00) | In situ/benign/ uncertain or unknown behavior neoplasms | Unreliable (0.00 - 0.00) |

**UCD = Underlying cause of death**
